# Supplementary material for: Crystalline phase transformation of Co-MOF derivatives on ordered mesoporous carbons for high-performance supercapacitor applications
Source: Royal Society of Chemistry journal article supplement (doi:10.1039/d3ce00133d), 2023-01-01
Supplement: d3ce00133d1.pdf [file d3ce00133d1.pdf]

## Supplementary Information

Fig. S1. The optical photographs of these materials in this work.

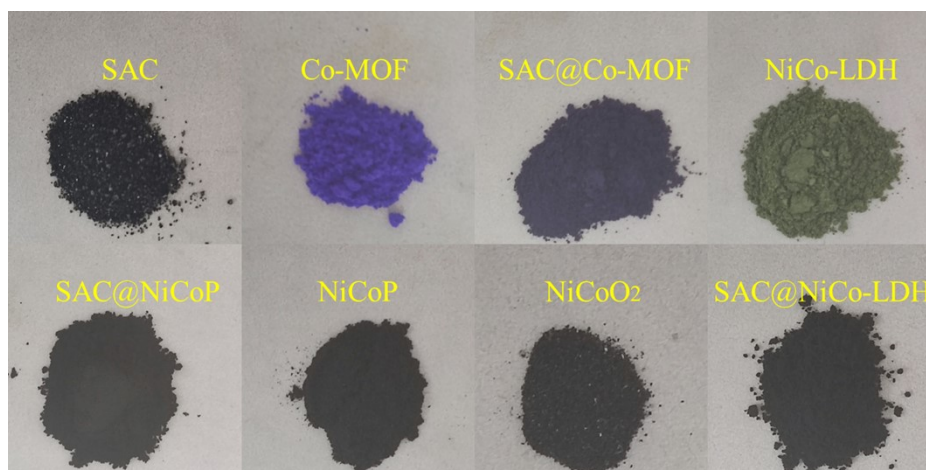

Fig. S2. The element contents of C, N, Ni, Co and P from EDS mapping.

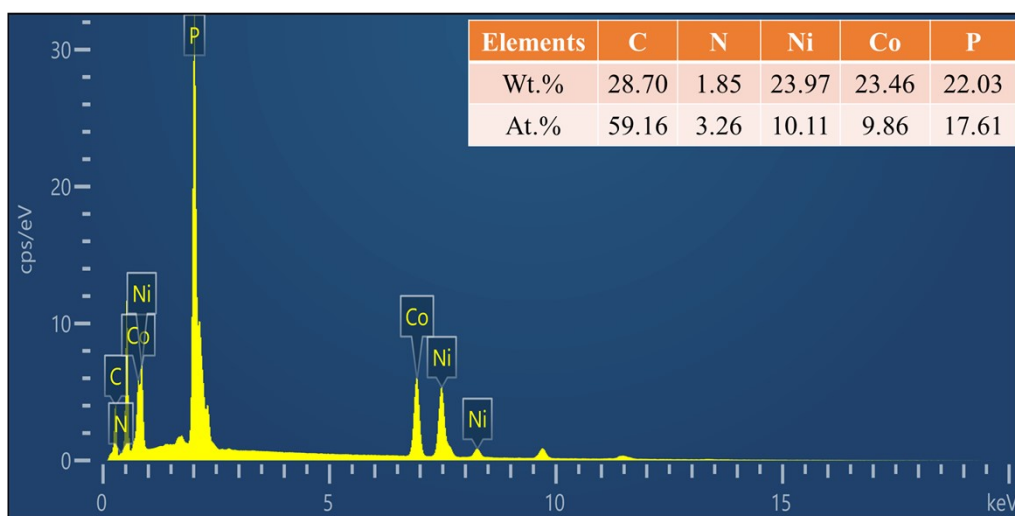

Fig. S3. (a) The CV and (b) GCD curves of AC.

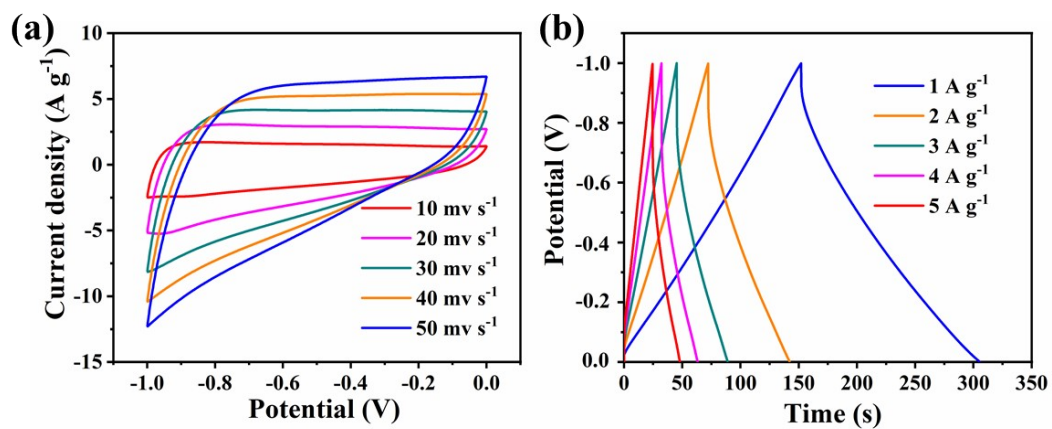

Table S1. The adsorption energy of  $\text{OH}^-$  and deprotonation energy of  $\text{H}^-$  from NiCo-LDH,  $\text{NiCoO}_2$  and NiCoP.

|                         | NiCo-LDH | NiCoO <sub>2</sub> | NiCoP |
|-------------------------|----------|--------------------|-------|
| $\text{Ad}_{\text{OH}}$ | -1.48    | -0.59              | -0.43 |
| $\text{Dad}_{\text{H}}$ | 1.75     | 3.19               | 0.68  |
